# Supplementary material
Source: Springer Nature journal article supplement (https://www.springermedizin.de/resource/supplementary/12978_2011_117_MOESM2_ESM.pdf/9602884)
Supplement: MOESM2 [file 9602884]

## B. Client high risk

### Physical

- Self-induced abortions (n=9)
- AIDS/TB (n=15)
- Sickle cell (n=2)
- Multiple C/S (n=4)

Contributing factors  
client high risk  
(n=80)

- Use of traditional medicines (n=15)
- Reluctance to visit clinic (n=12)
- No birth planning (n=18)
- Cultural beliefs and practices (n=3)

Health seeking  
behaviour

### Family circumstances

- Multiple partners (n=2)
- No supporting partner (n=10)
- Married man as partner (n=7)
- Girls living away from home (n=4)
- Orphans (n=2)
